# Supplementary material for: Sim3C: simulation of Hi-C and Meta3C proximity ligation sequencing technologies
Source: PubMed Central journal article supplement (PMC5827349; doi:10.1093/gigascience/gix103), 2017-11-15
Supplement: gix103_response-to-reviewer-comments_revision-1.pdf [file gix103_response-to-reviewer-comments_revision-1.pdf]

## **Author's Response To Reviewer Comments**

We have made the requested minor revisions.
